# Supplementary material for: Microflow synthesis of a formulation of phosphorus fertiliser to enhance the P content in soil and P uptake in wheat
Source: Royal Society of Chemistry journal article supplement (doi:10.1039/d3gc02859c), 2023-01-01
Supplement: d3gc02859c1.pdf [file d3gc02859c1.pdf]

*Supporting Material for*

**Micro-flow synthesis of a formulation of phosphorus fertiliser to enhance P-content in soil and p uptake in wheat**

Tu Nguyen Quang Le,<sup>ab</sup> Karen Robertson,<sup>c</sup> Marc Escribà-Gelonch,<sup>de</sup> Petra Marschner,<sup>f</sup> Nam Nghiep Tran,<sup>ag</sup> Philip Michael Williams,<sup>b</sup> Ian Fisk,<sup>bh</sup> Volker Hessel,<sup>\*ai</sup>

Pages: 8, Figures: 6, Table: 1

**Table S1.** Reaction scheme for the preparation of CS-ACP-Cit

**Fig. S1** Schematic illustration of CFI system for the preparation of ACP-Cit

**Fig. S2** Schematic illustration of CFI system for the preparation of CS-ACP-Cit

**Fig. S3** X-ray diffraction patterns of (a) ACP, (b) ACP-Cit, (c) CS-ACP-Cit,  $\beta$ -TCP (JCPDS no. 09-0169) and hydroxyapatite (JCPDS no. 09-0432)

**Fig. S4** Size distribution of commercial apatite and the prepared composites: ACP; phosphate-citrate (ACP-Cit) and chitosan-phosphate-citrate (CS-ACP-Cit-8)

**Fig. S5** Scanning electron microscopy (SEM) images of prepared composites: (A) ACP; (B) ACP-Cit and (C) CS-ACP-Cit

**Fig. S6** Wheat growing stages

Table S1. Reaction scheme for the preparation of CS-ACP-Cit

| Reaction                                                                                                                                                            | Ref. |
|---------------------------------------------------------------------------------------------------------------------------------------------------------------------|------|
| $\text{Ca}^{2+} + \text{H}_2\text{PO}_4^- + \text{OH}^- \rightarrow \text{ACP} + \text{H}_2\text{O}$                                                                | 1    |
| Surface association of citrate on ACP:<br>$\text{ACP} + \text{C}_6\text{H}_5\text{O}_7^{3-} \rightarrow \text{ACP}-\text{C}_6\text{H}_5\text{O}_7^{3-}$             | 2    |
| Incorporation of citrate into ACP:<br>$\text{ACP} + \text{C}_6\text{H}_5\text{O}_7^{3-} \rightarrow \text{ACP}-(\text{C}_6\text{H}_5\text{O}_7) + \text{PO}_4^{3-}$ | 3    |
| $\text{Chi} + \text{C}_6\text{H}_5\text{O}_7^{3-} \rightarrow \text{Chi}-\text{C}_6\text{H}_5\text{O}_7^{3-}-\text{Chi}$                                            | 4    |

Note: Chi = chitosan

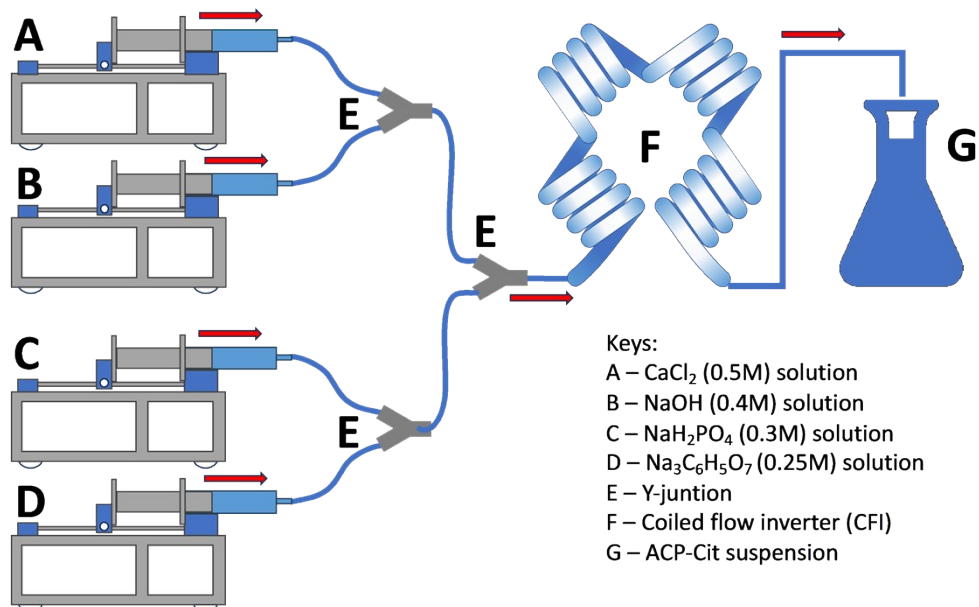

Fig. S1 Schematic illustration of CFI system for the preparation of ACP-Cit

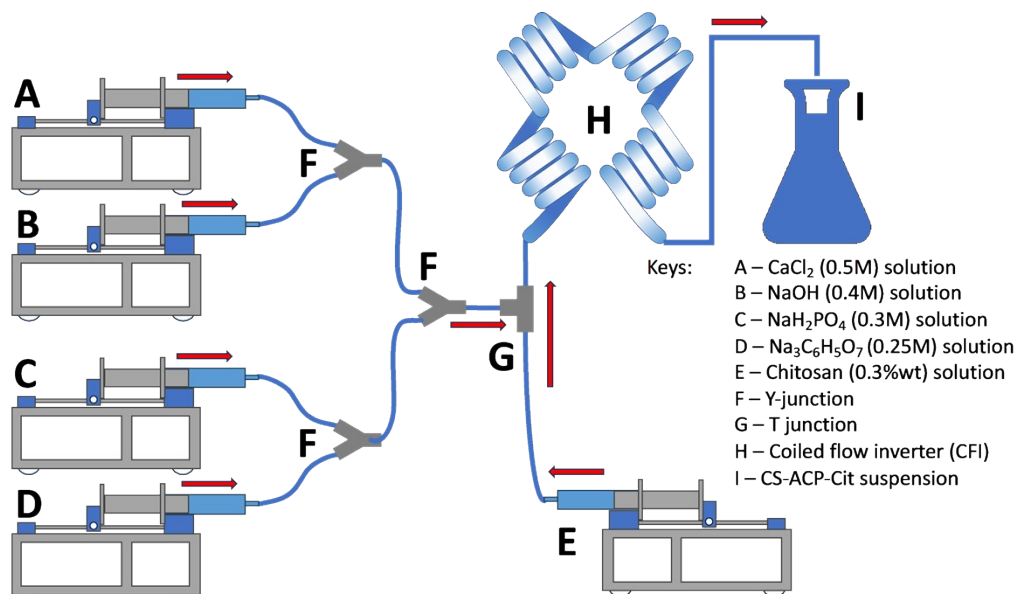

Fig. S2 Schematic illustration of CFI system for the preparation of CS-ACP-Cit

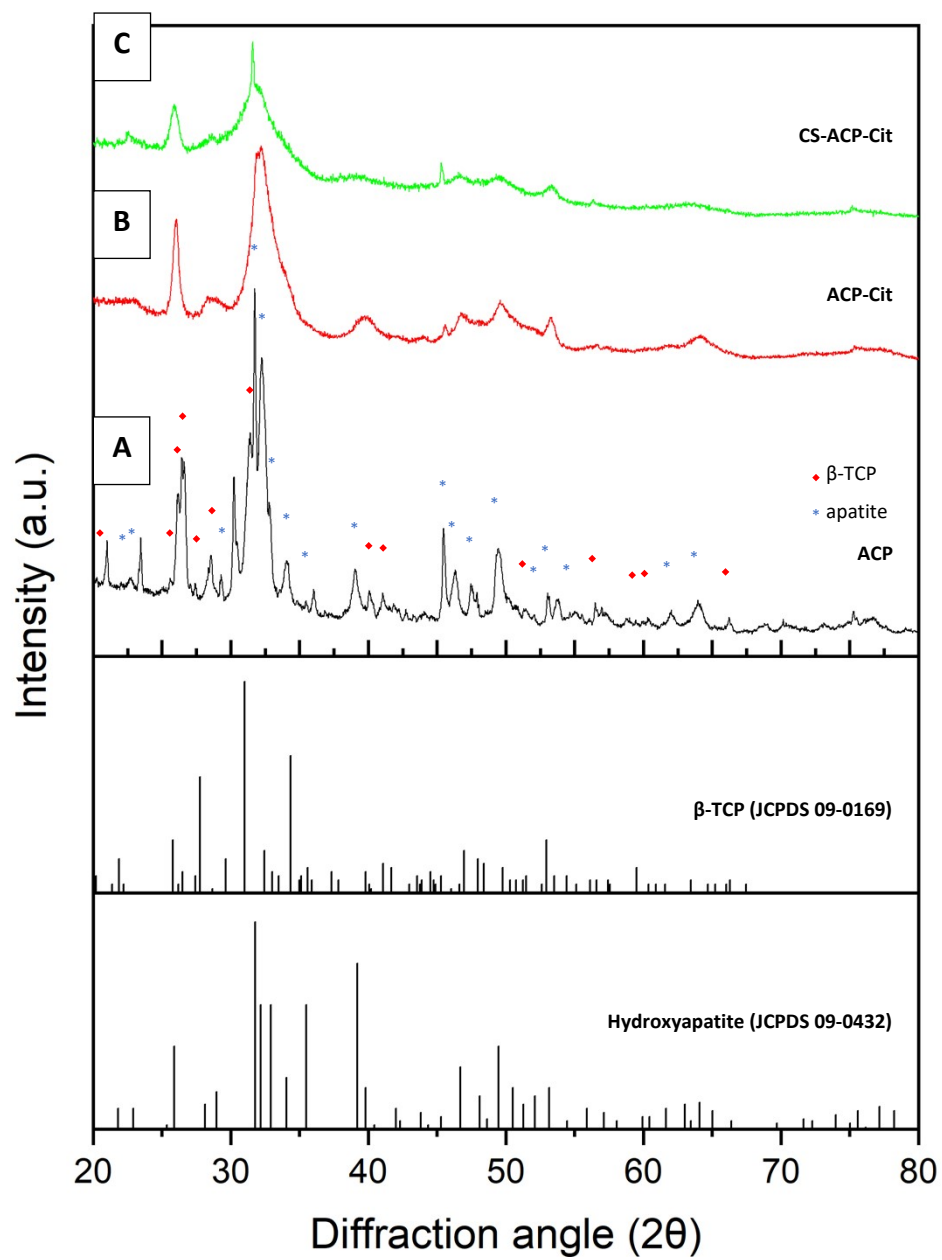

Fig. S3 X-ray diffraction patterns of (A) ACP, (B) ACP-Cit, (C) CS-ACP-Cit,  $\beta$ -TCP (JCPDS no. 09-0169) and hydroxyapatite (JCPDS no. 09-0432).

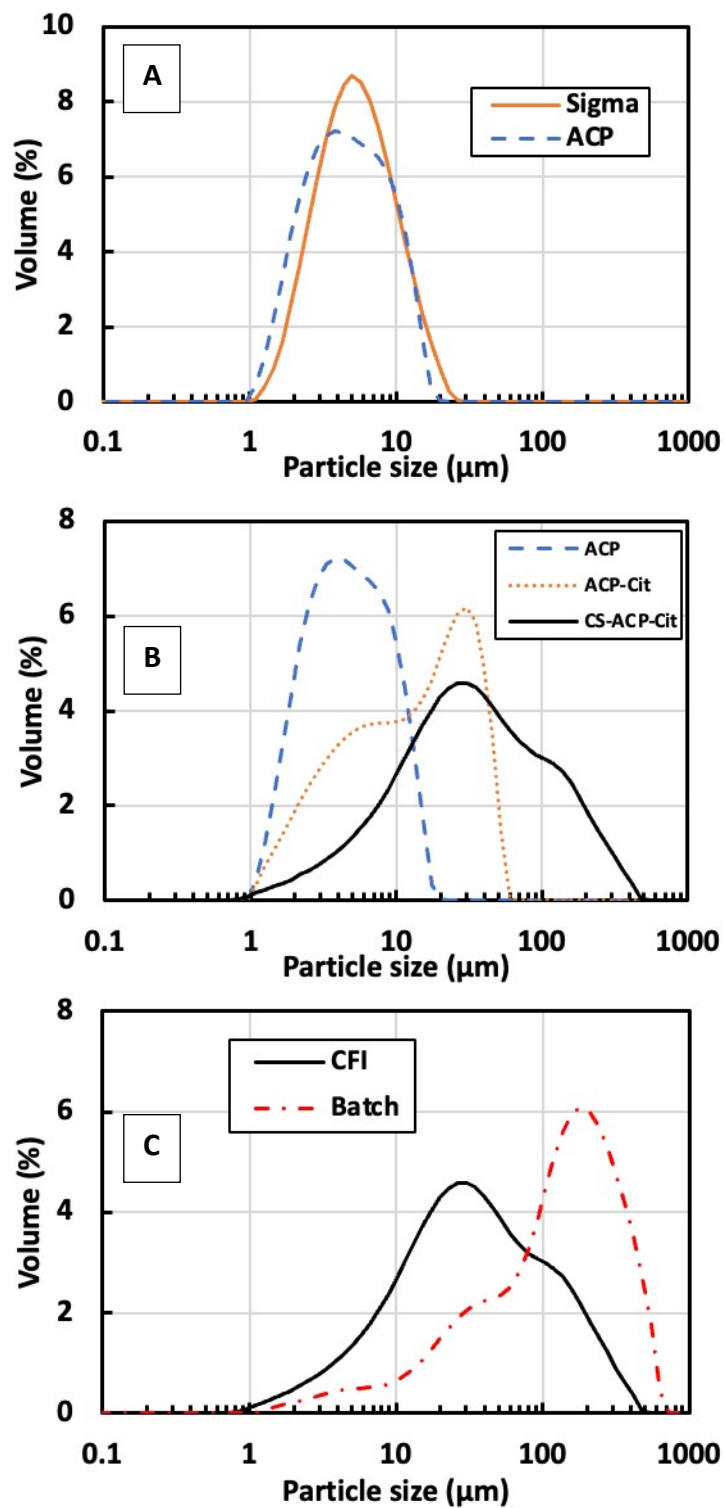

Fig. S4 Size distribution of commercial apatite and prepared composites.

A: Commercial apatite (Sigma Aldrich) and ACP;

B: ACP, ACP-Cit and CS-ACP-Cit prepared by coiled flow inverter (CFI);

*C: CS-ACP-Cit prepared by batch and CFI*

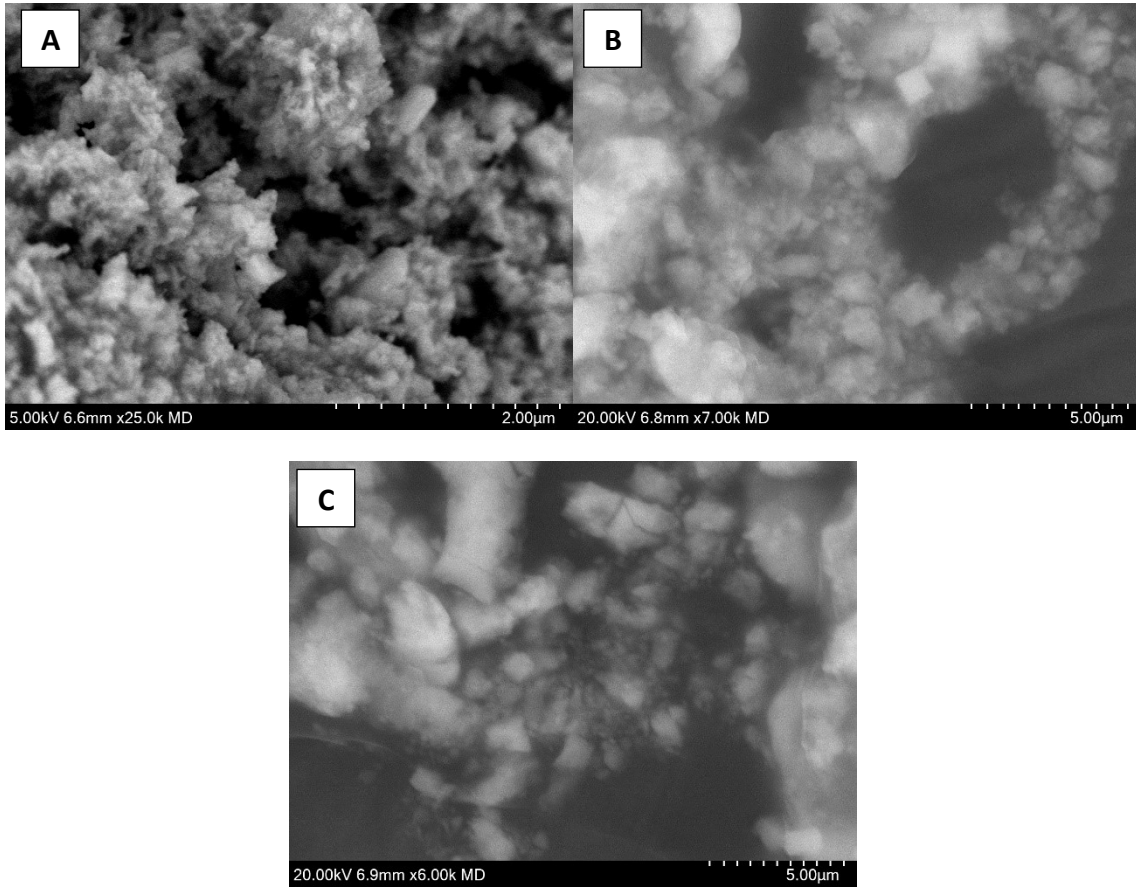

*Fig. S5 Scanning electron microscopy (SEM) images of prepared composites: (A) ACP; (B) ACP-Cit and (C) CS-ACP-Cit*

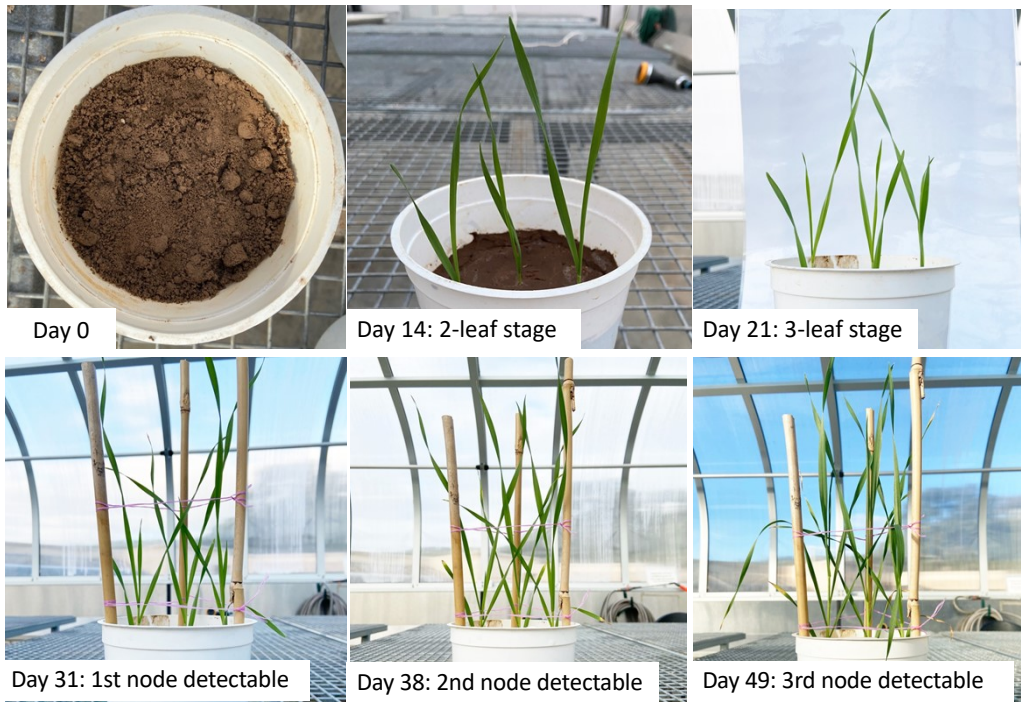

*Fig. S6 Wheat growing stages*

## References

1. M. Ebrahimi, M. G. Botelho and S. V. Dorozhkin, *Materials Science and Engineering: C*, 2017, **71**, 1293-1312.
2. Y. Chen, W. Gu, H. Pan, S. Jiang and R. Tang, *CrystEngComm*, 2014, **16**, 1864-1867.
3. M. A. Martins, C. Santos, M. M. Almeida and M. E. V. Costa, *Journal of colloid and interface science*, 2008, **318**, 210-216.
4. M. Pieróg, M. Gierszewska-Drużyńska and J. Ostrowska-Czubenko, *Progress on Chemistry and Application of Chitin and its Derivatives. Polish Chitin Society, Łódź*, 2009, **75**, 3.
